# Supplementary material for: Cotton textile inspires MoS2@reduced graphene oxide anodes towards high-rate capability or long-cycle stability sodium/lithium-ion batteries
Source: Royal Society of Chemistry journal article supplement (doi:10.1039/d2qi02010f), 2022-11-24
Supplement: d2qi02010f1.pdf [file d2qi02010f1.pdf]

**Cotton textile inspires MoS<sub>2</sub>@reduced graphene oxide anodes towards high-rate capability or long-cycle stability sodium/lithium-ion batteries**

Xue Liu,<sup>a,b,†,\*</sup> Haicong Ji,<sup>a,‡</sup> Bin Peng,<sup>a</sup> Zhaoning Cui,<sup>a</sup> Qiongzhen Liu,<sup>a</sup> Qinghua Zhao,<sup>a</sup>

Liyan Yang<sup>a</sup> and Dong Wang<sup>a,c,\*</sup>

<sup>a</sup>*Key Laboratory of Textile Fiber and Products (Wuhan Textile University),*

*Ministry of Education, Hubei International Scientific and Technological Cooperation*

*Base of Intelligent Textile Materials & Application, College of Materials Science and*

*Engineering, Wuhan Textile University, Wuhan 430200, China*

<sup>b</sup>*Key Laboratory of Advanced Energy Materials Chemistry (Ministry of Education),*

*College of Chemistry, Nankai University, Tianjin 300071, China*

<sup>c</sup>*College of Chemistry, Chemical Engineering and Biotechnology, Donghua University,*

*Shanghai, 201620, China*

**\*Corresponding author**

Email: [xueliu@wtu.edu.cn](mailto:xueliu@wtu.edu.cn); [wangdon08@126.com](mailto:wangdon08@126.com)

<sup>‡</sup>These authors contribute equally to this work

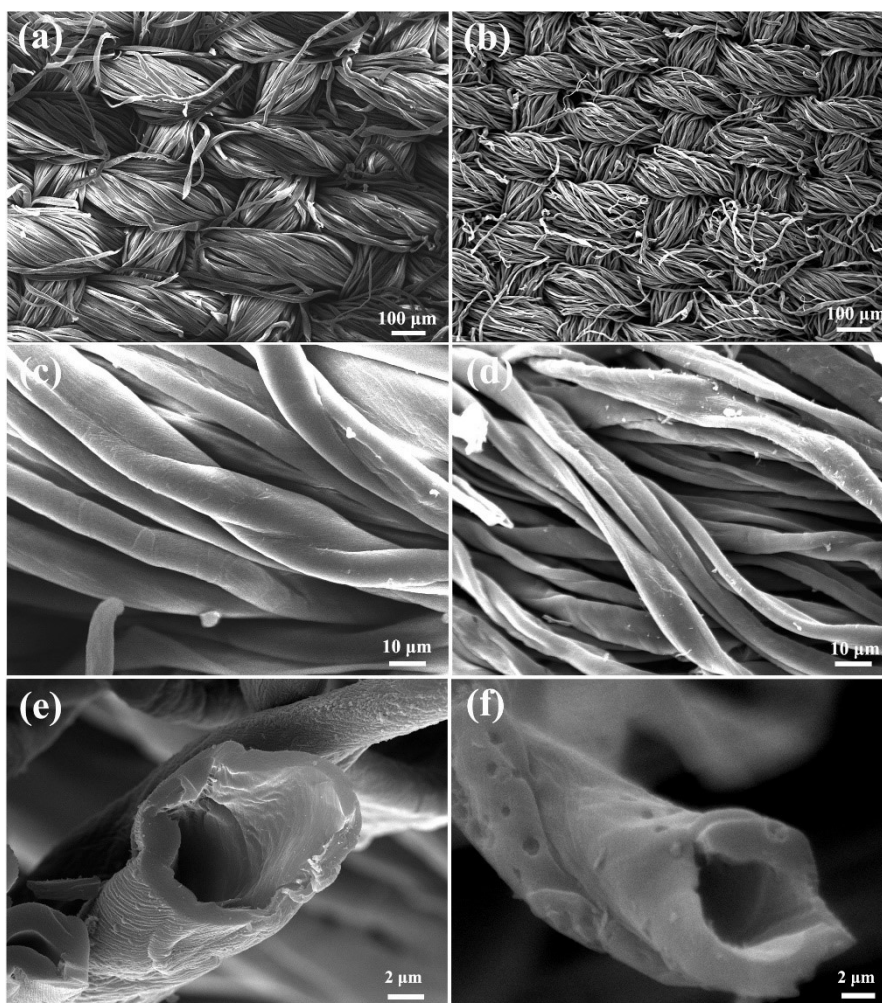

**Figure S1.** SEM images of cotton textile (a,c,e) before and (b,d,f) after annealing at 900 °C.

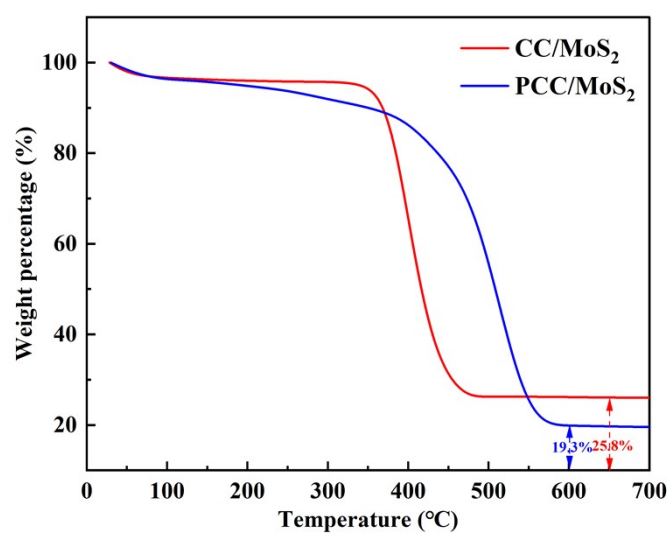

**Figure S2.** TGA curves of CC/MoS<sub>2</sub>-1.5 and PCC/MoS<sub>2</sub>-1.5.

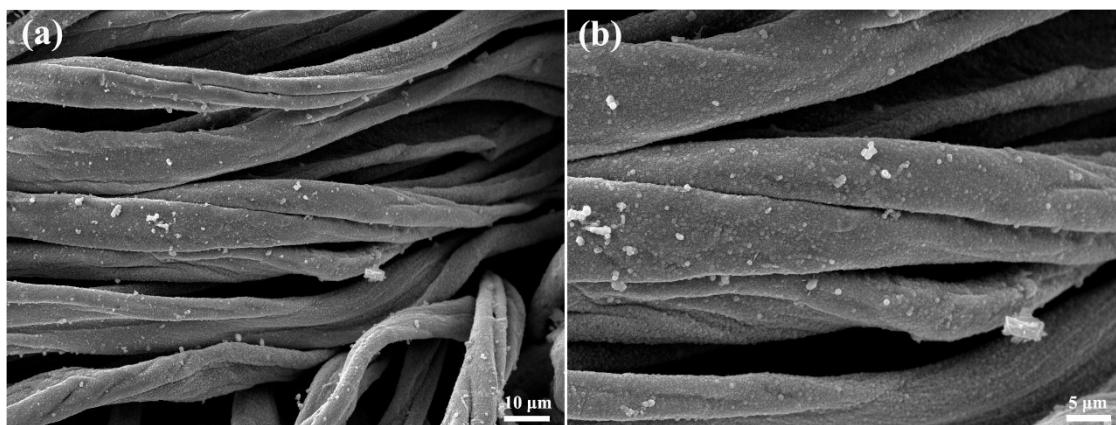

**Figure S3.** Low-magnification SEM images of CC/MoS<sub>2</sub>-1.5.

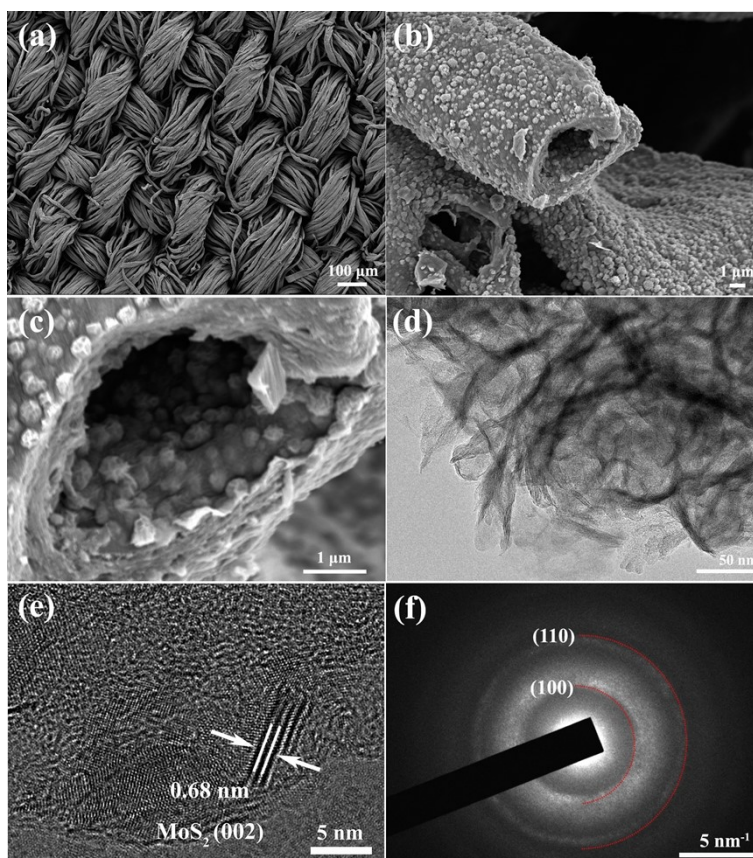

**Figure S4.** (a-c) SEM images of CC/MoS<sub>2</sub>@RGO-700 textile at different magnifications. (d, e) TEM images of CC/MoS<sub>2</sub>@RGO-700 textile. (f) The SAED pattern of CC/MoS<sub>2</sub>@RGO-700 textile.

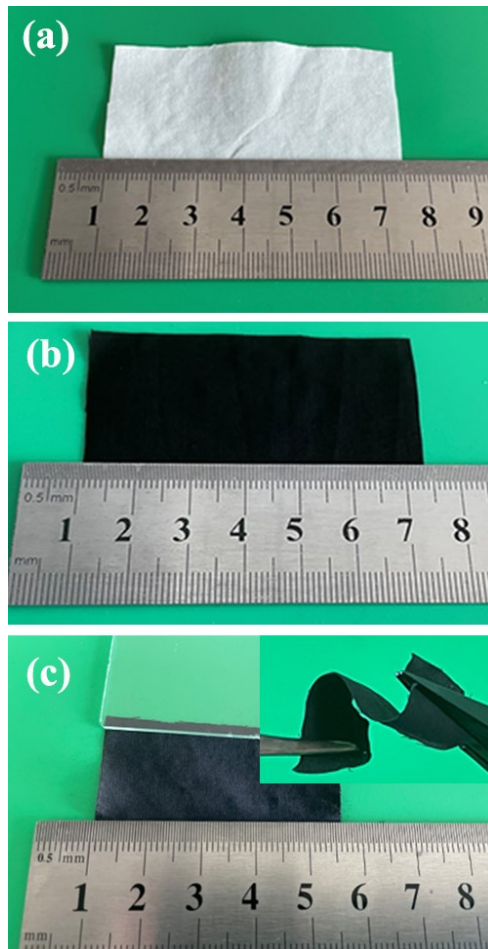

**Figure S5.** Digital images of (a) Cotton, (b) Cotton/MoS<sub>2</sub>, and (c) CC/MoS<sub>2</sub>@RGO-700 textile.

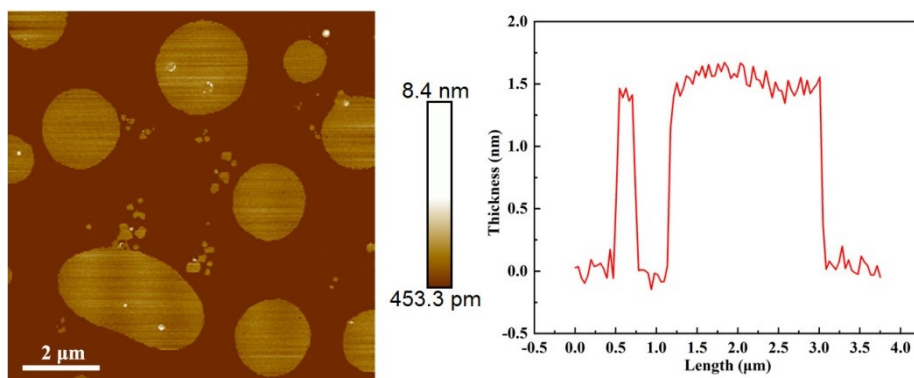

**Figure S6.** AFM results of CC/MoS<sub>2</sub>@RGO-700 textile.

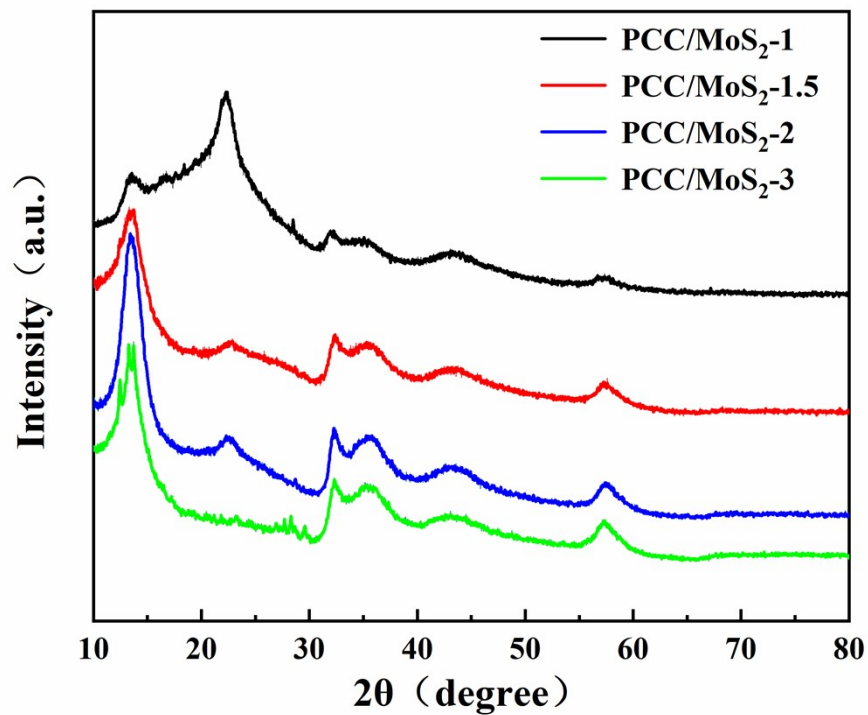

Figure S7. XRD patterns of PCC/MoS<sub>2</sub> samples.

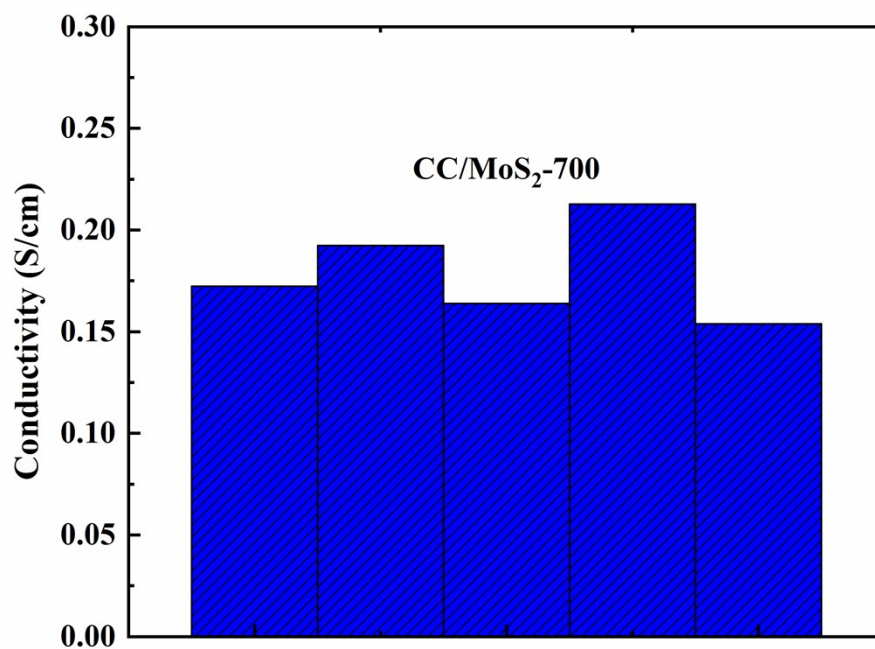

Figure S8. Electric conductivity of CC/MoS<sub>2</sub>-700.

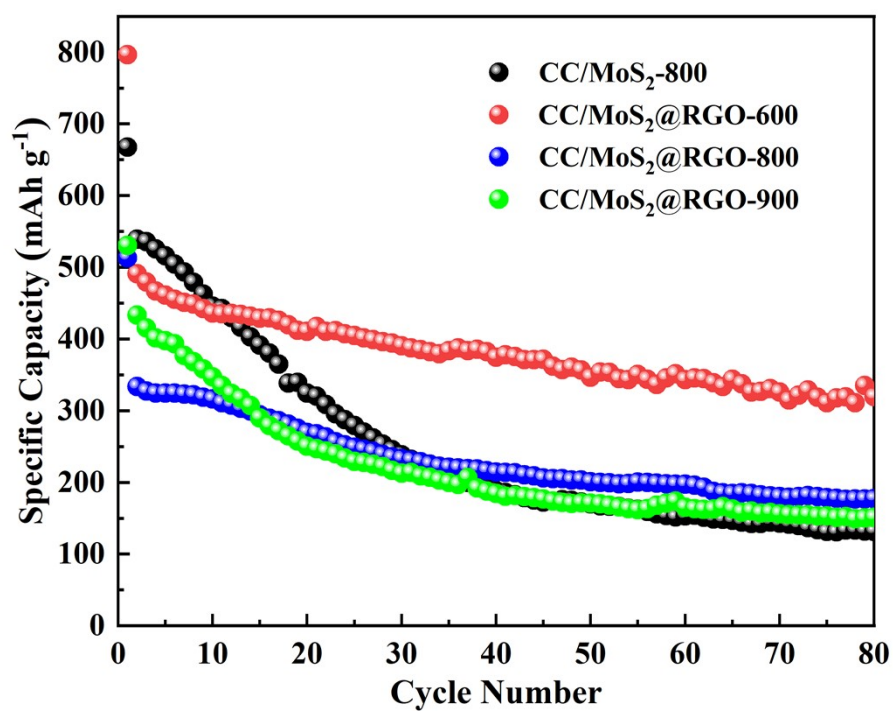

**Figure S9.** Cycling performances of CC/MoS<sub>2</sub>-800, CC/MoS<sub>2</sub>@RGO-600, CC/MoS<sub>2</sub>@RGO-800 and CC/MoS<sub>2</sub>@RGO-900 at 100 mA g<sup>-1</sup>.

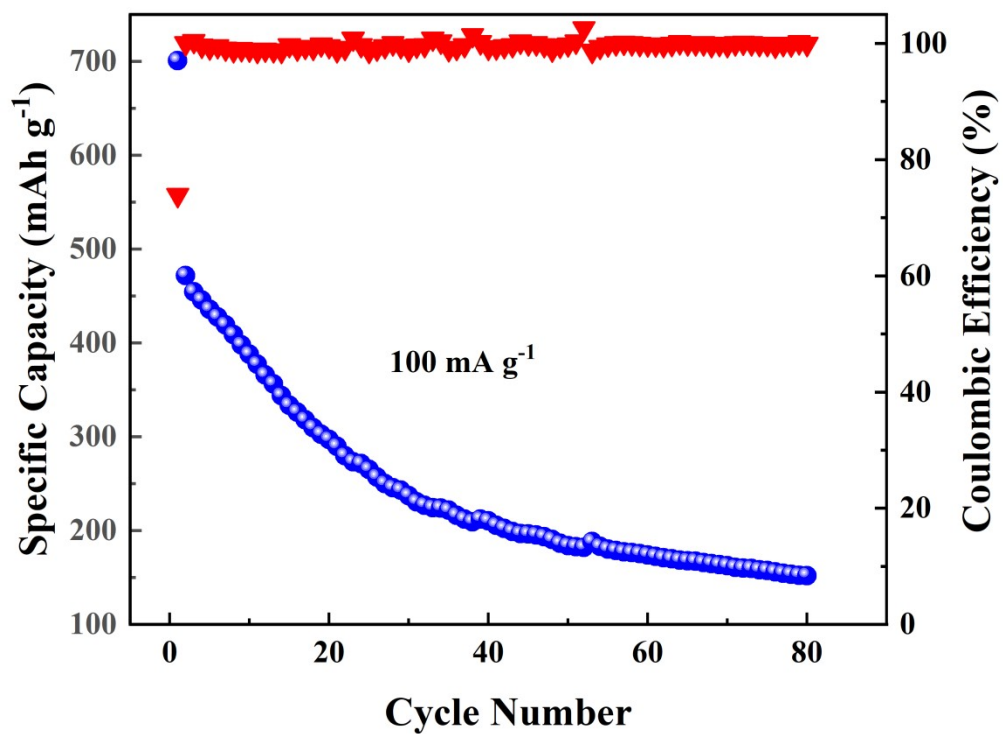

**Figure S10.** Cycling performance and CE profiles of PCC/MoS<sub>2</sub>-900 at 100 mA g<sup>-1</sup>.

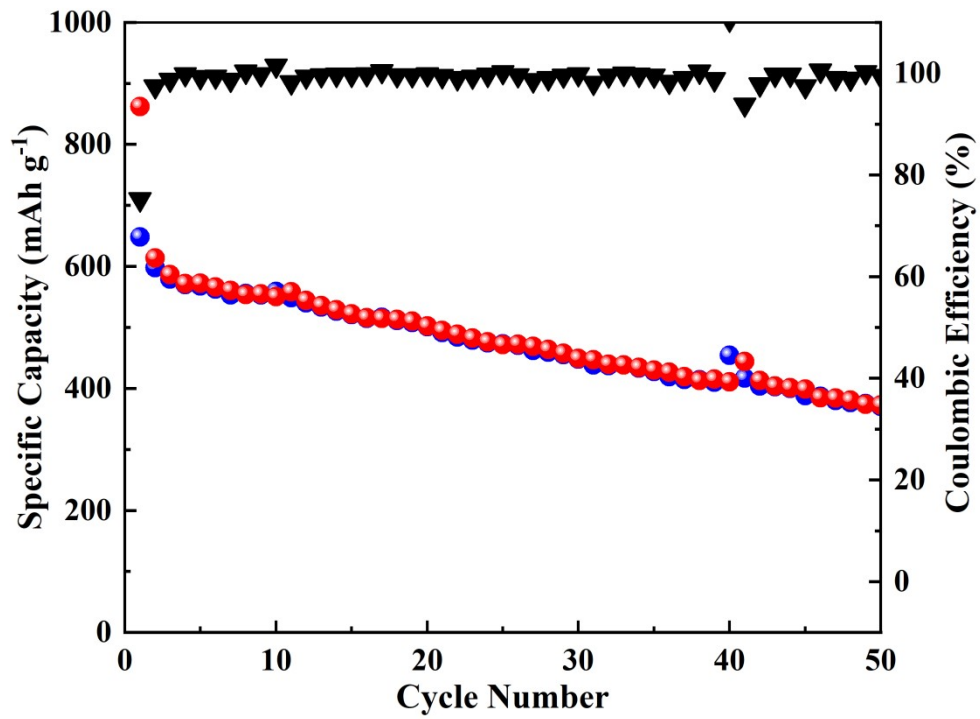

**Figure S11.** Cycling performance of CC/MoS<sub>2</sub>@RGO-700 electrode at 50 mA g<sup>-1</sup> for SIBs.



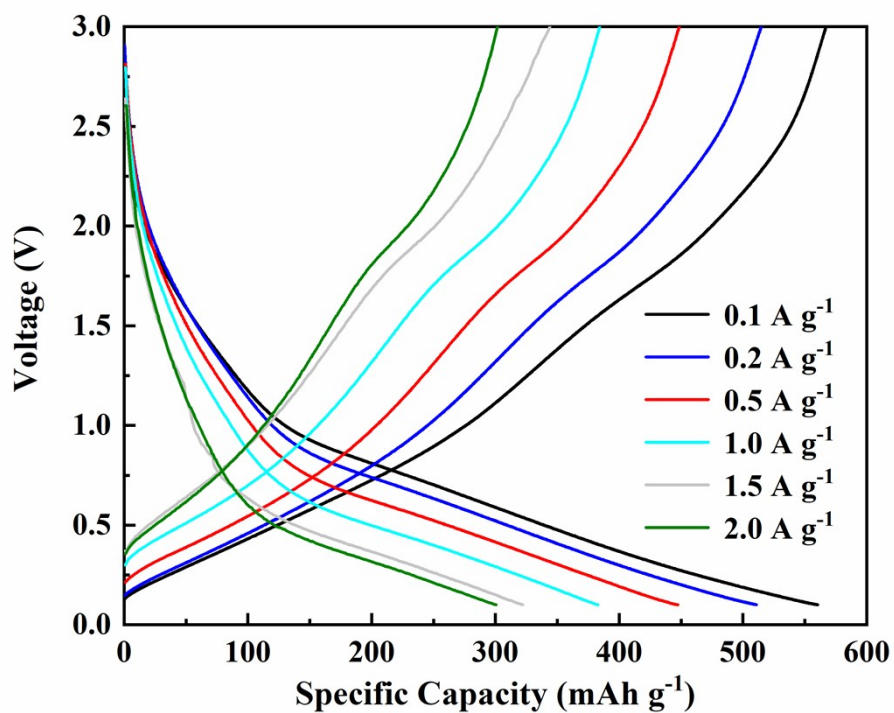

**Figure S12.** Discharge/charge profiles of CC/MoS<sub>2</sub>@RGO-700 at various current densities in Na half cells.

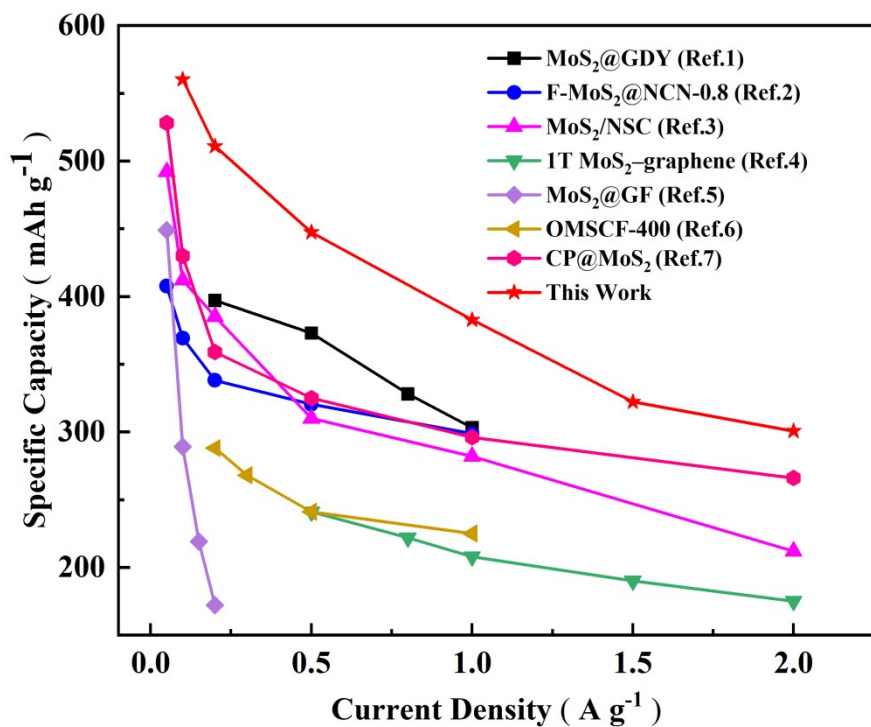

Figure S13. Comparison of rate capabilities for the MoS<sub>2</sub>-based materials.

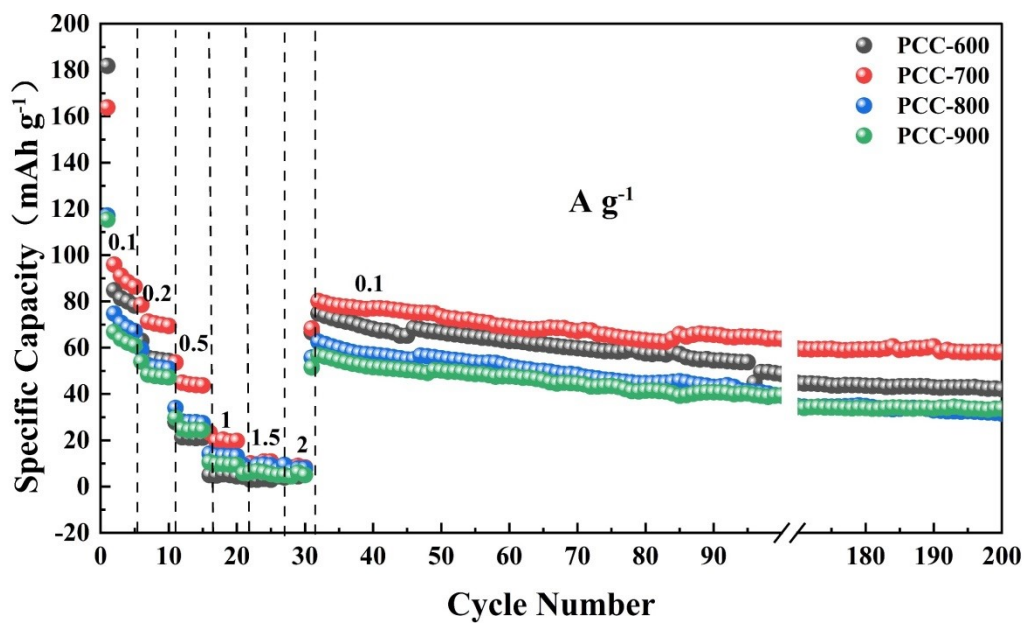

Figure S14. Rate capabilities of PCC at various current densities for sodium storage.

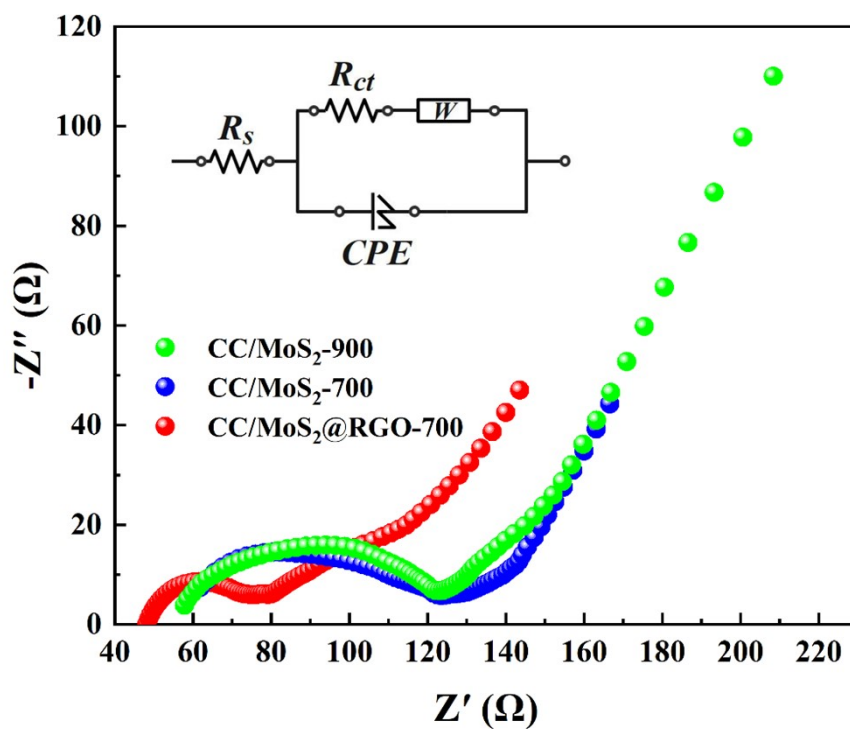

**Figure S15.** EIS curves of CC/MoS<sub>2</sub>-700, CC/MoS<sub>2</sub>-900 and CC/MoS<sub>2</sub>@RGO-700 electrodes in Na half cells after 10 cycles, and the inset is the equivalent circuit.

**Table S1.** Comparison of  $R_{ct}$  values in Na half cells after 5 and 10 cycles.

| Cycle | CC/MoS <sub>2</sub> -700 | CC/MoS <sub>2</sub> -900 | CC/MoS <sub>2</sub> @RGO-700 |
|-------|--------------------------|--------------------------|------------------------------|
| 5th   | 37.74 Ω                  | 25.61 Ω                  | 30.24 Ω                      |
| 10th  | 68.72 Ω                  | 67.26 Ω                  | 36.53 Ω                      |

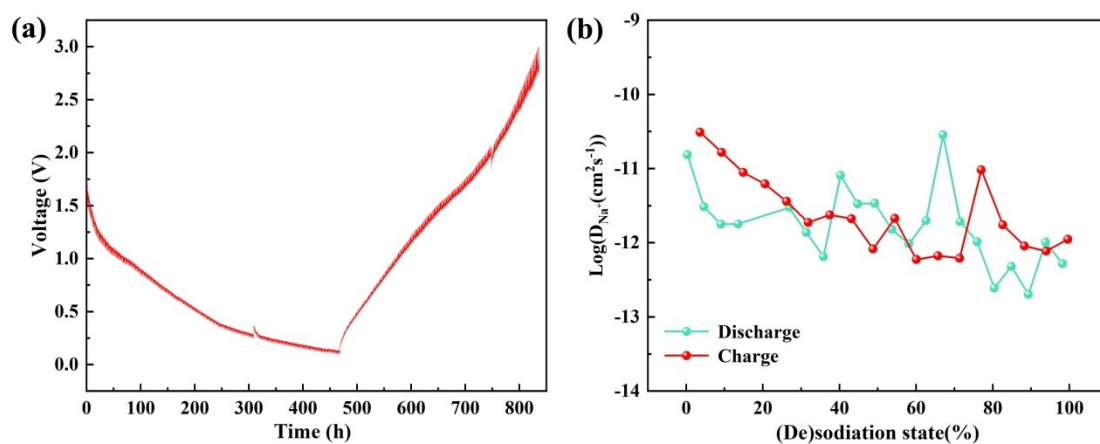

**Figure S16.** GITT curve and Na<sup>+</sup> diffusion coefficient for CC/MoS<sub>2</sub>@RGO-700 electrode.

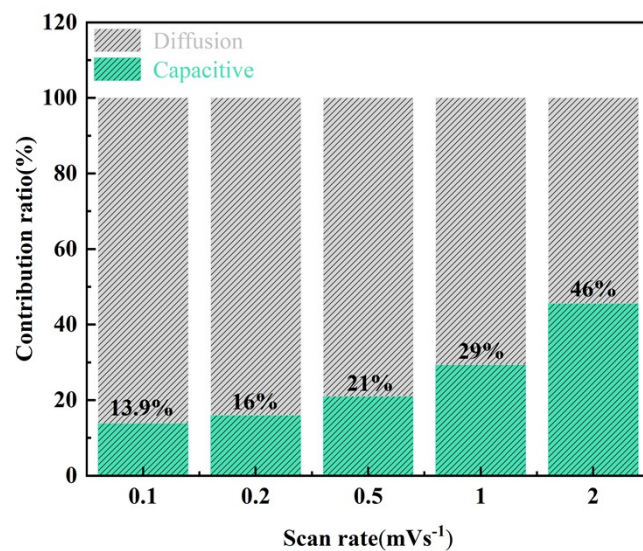

**Figure S17.** Contribution ratio of capacitive and diffusion-controlled capacities in Na half cells at various scan rates of CC/MoS<sub>2</sub>@RGO-700.

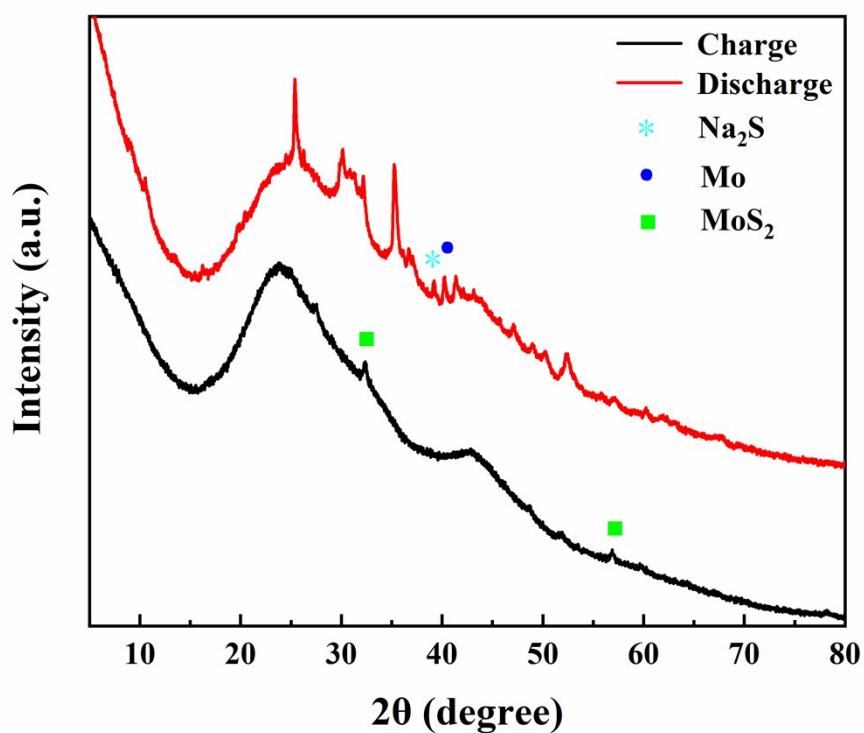

**Figure S18.** Ex situ XRD patterns of CC/ $\text{MoS}_2$ @RGO-700 electrode in Na half cells during the first cycle.

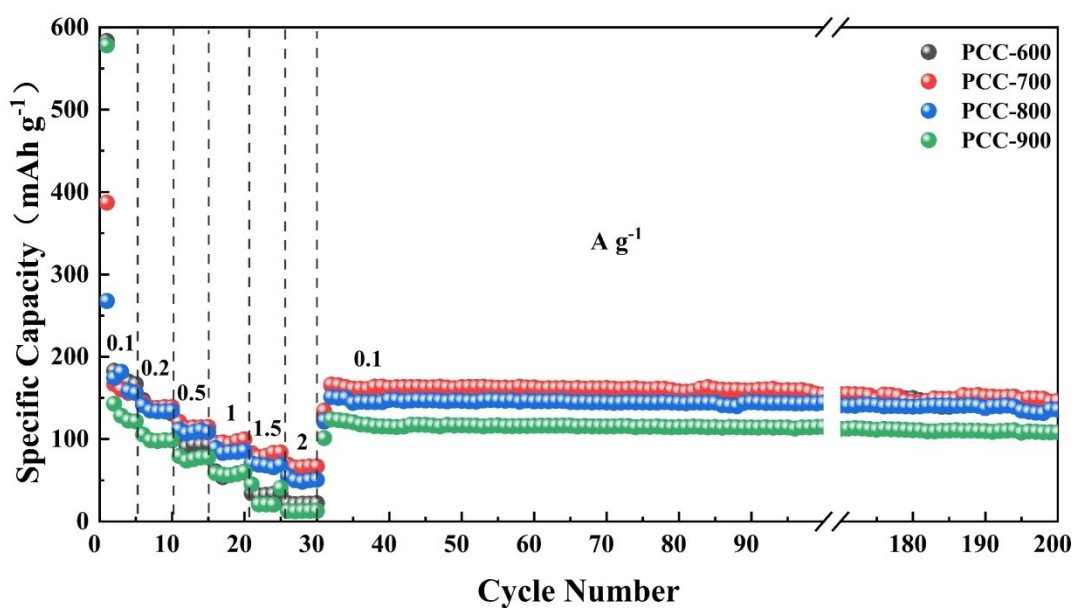

**Figure S19.** Rate capabilities of PCC at various current densities for lithium storage.

**Table S2.** Rate capabilities of PCC for lithium storage.

| Material | Capacity (mAh/g) |         |         |       |         |       |
|----------|------------------|---------|---------|-------|---------|-------|
|          | 0.1 A/g          | 0.2 A/g | 0.5 A/g | 1 A/g | 1.5 A/g | 2 A/g |
| PCC-600  | 174.5            | 136     | 93.2    | 56.1  | 32.5    | 21.7  |
| PCC-700  | 160.3            | 137.8   | 114.2   | 94.2  | 79.6    | 66.1  |
| PCC-800  | 181.6            | 133.6   | 108.6   | 84.2  | 67.9    | 48.3  |
| PCC-900  | 128.4            | 97.6    | 75.7    | 56.1  | 20.8    | 12.8  |

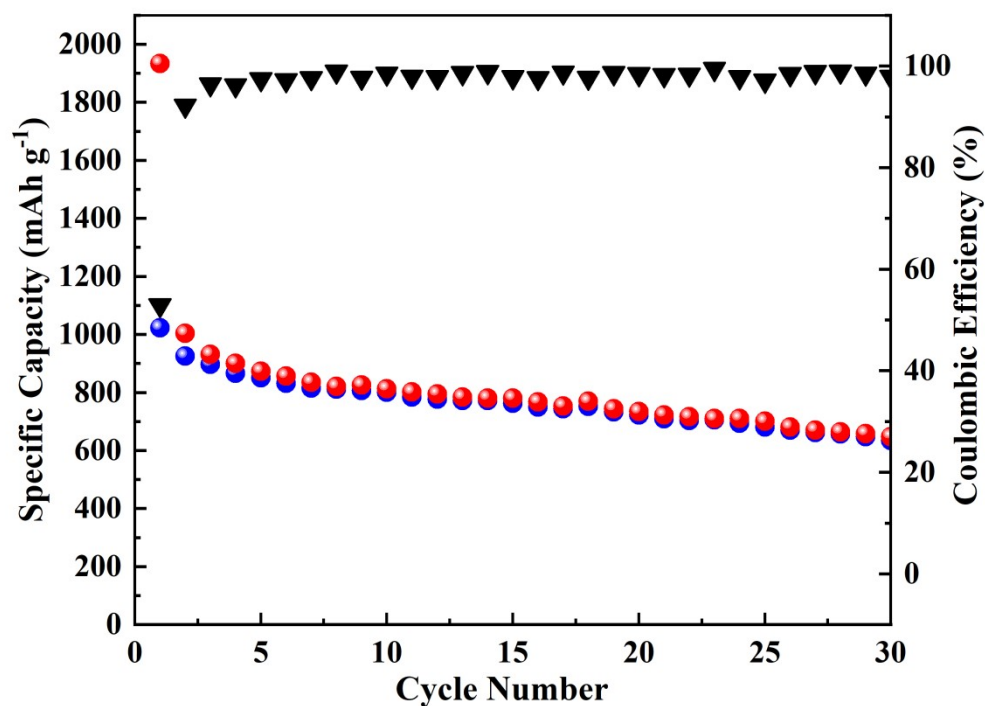

**Figure S20.** Cycling performance of CC/MoS<sub>2</sub>@RGO-700 electrode at 50 mA g<sup>-1</sup> for LIBs.

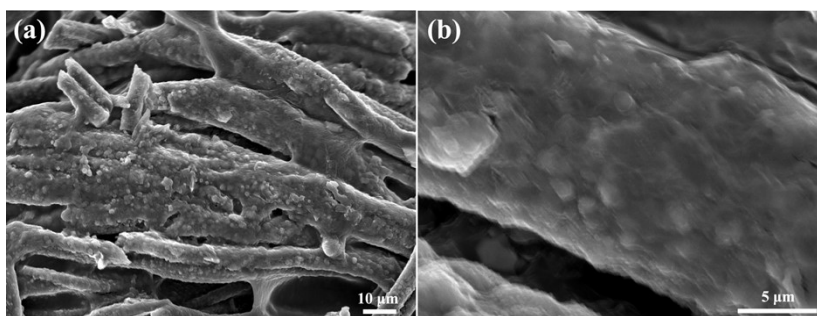

**Figure S21.** Morphology characterization of CC/MoS<sub>2</sub>@RGO-700 electrode after cycling.

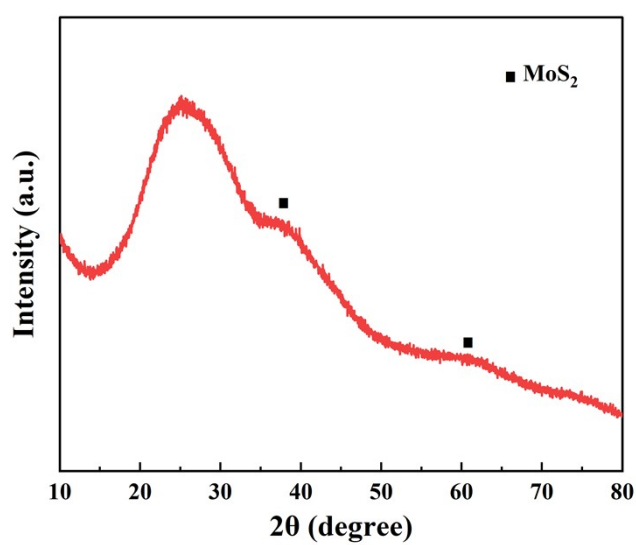

**Figure S22.** Structural characterization of CC/MoS<sub>2</sub>@RGO-700 electrode after cycling.

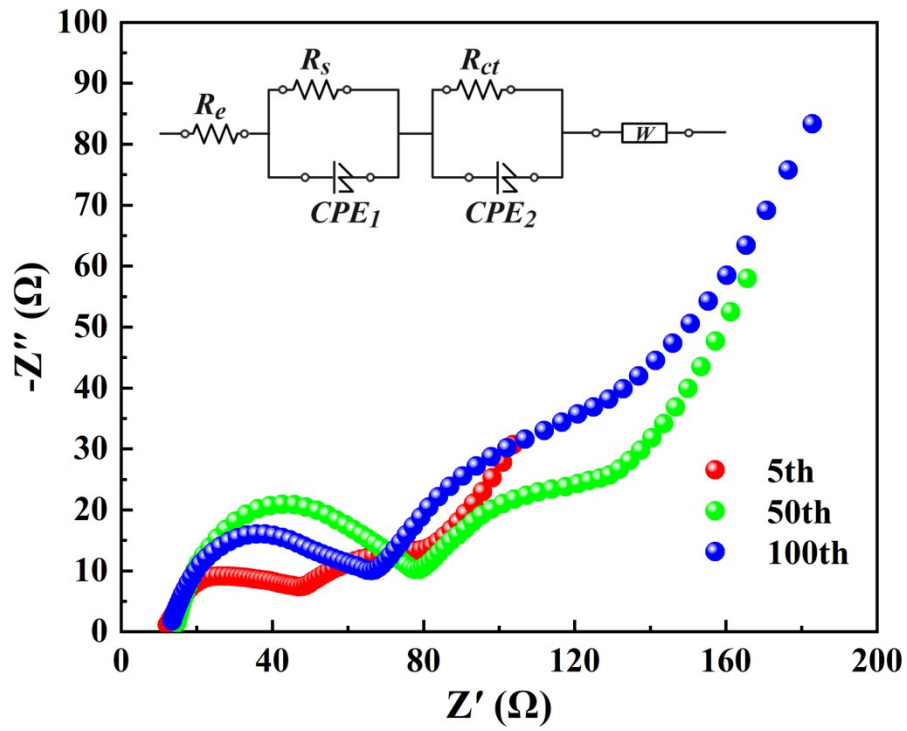

**Figure S23.** Nyquist plots of CC/MoS<sub>2</sub>@RGO-700 electrodes in Li half cells after different cycles, and the equivalent circuit used for analysis.

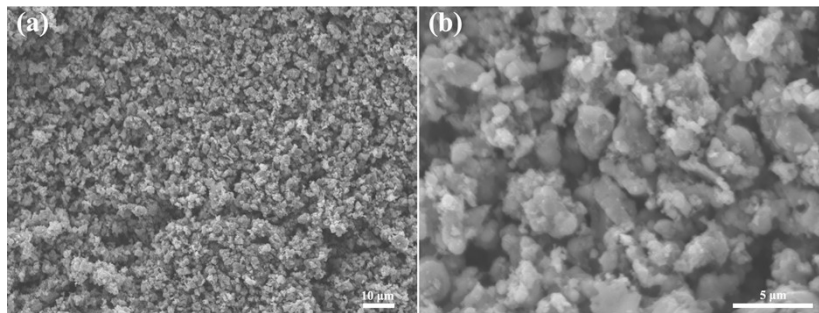

**Figure S24.** SEM images of LiFePO<sub>4</sub>.



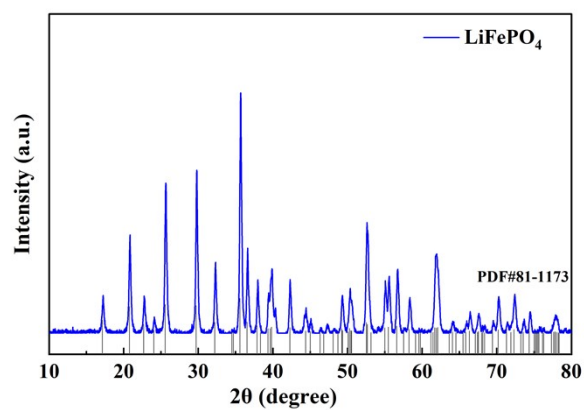

**Figure S25.** XRD pattern of LiFePO<sub>4</sub>.

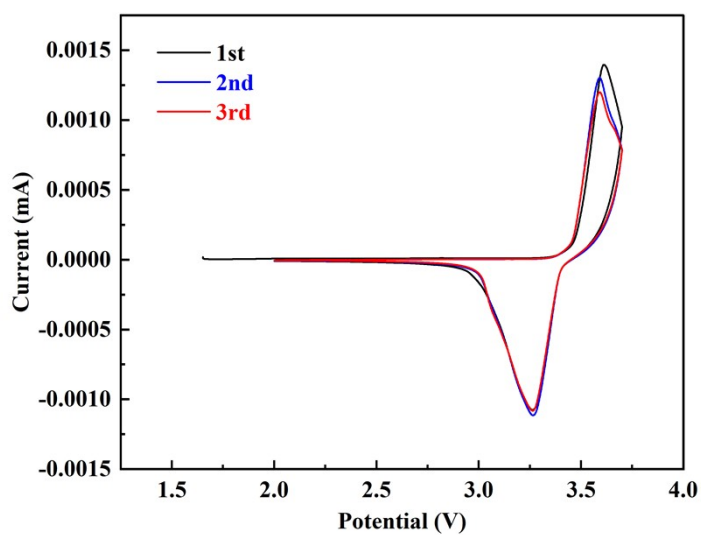

**Figure S26.** CV curves of LiFePO<sub>4</sub> electrode at 0.1 mV s<sup>-1</sup>.

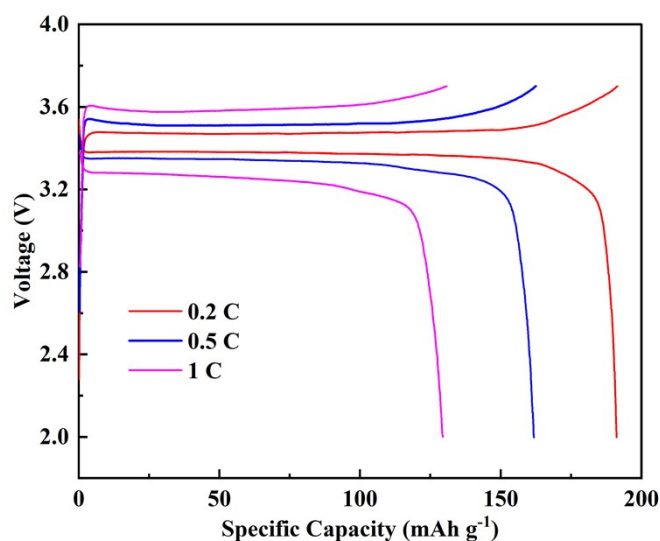

**Figure S27.** Charge/discharge profiles of LiFePO<sub>4</sub> electrode at different rates.

### Supporting References

- [1] Xu, J.; Liu, Q.; Dong Z.; Wang, L.; Xie, X.; Jiang, Y.; Wei, Z.; Gao, Y.; Zhang, Y.; Huang, K. Interconnected MoS<sub>2</sub> on 2D graphdiyne for reversible sodium storage. *ACS Appl. Mater. Interfaces* 2021, *13*, 54974-54980.
- [2] Li, J.; Gao, W.; Huang, L.; Jiang, Y.; Chang, X.; Sun, S.; Pan, L. In situ formation of few-layered MoS<sub>2</sub>@N-doped carbon network as high performance anode materials for sodium-ion batteries. *Appl. Surf. Sci.* 2022, *571*, 151307.
- [3] Wang, T.; Xi, Q.; Wang, K.; Zeng, Z.; Du, Z.; Xu, Z.; Xie, L.; Ai, W.; Huang, W. Covalently binding ultrafine MoS<sub>2</sub> particles to N, S co-doped carbon renders excellent Na storage performances. *Carbon* 2021, *184*, 177-185.
- [4] Geng, X.; Jiao, Y.; Han, Y.; Mukhopadhyay, A.; Yang, L.; Zhu, H. Freestanding metallic 1T MoS<sub>2</sub> with dual ion diffusion paths as high rate anode for sodium-ion batteries. *Adv. Funct. Mater.* 2017, *27*(40), 1702998.
- [5] Xiang, J.; Dong, D.; Wen, F.; Zhao, J.; Zhang, X.; Wang, L.; Liu, Z. Microwave synthesized self-standing electrode of MoS<sub>2</sub> nanosheets assembled on graphene

foam for high-performance Li-Ion and Na-Ion batteries. *J. Alloys Compd.* 2016, 660, 11-16.

- [6] Zhang, Y.; Tao, H.; Li, T.; Du, S.; Li, J.; Zhang, Y.; Yang, X. Vertically oxygen-incorporated MoS<sub>2</sub> nanosheets coated on carbon fibers for sodium-ion batteries. *ACS Appl. Mater. Interfaces* 2018, 10, 35206-35215.
- [7] Tu, F.; Han, Y.; Du, Y.; Ge, X.; Weng, W.; Zhou, X.; Bao, J. Hierarchical nanospheres constructed by ultrathin MoS<sub>2</sub> nanosheets braced on nitrogen-doped carbon polyhedra for efficient lithium and sodium storage. *ACS Appl. Mater. Interfaces* 2019, 11, 2112-2119.
